# Supplementary material
Source: Springer Nature journal article supplement (https://www.springermedizin.de/resource/supplementary/12990_2009_216_MOESM2_ESM.pdf/9612814)

**A**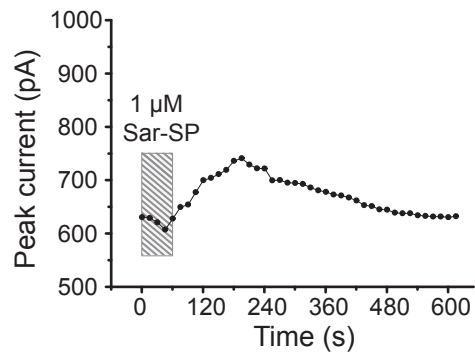**B**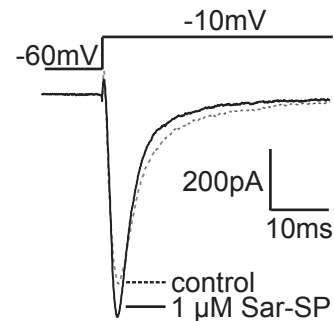**C**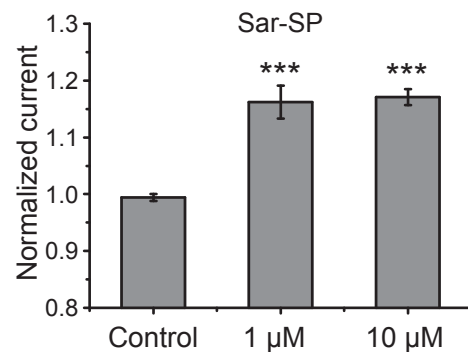**D**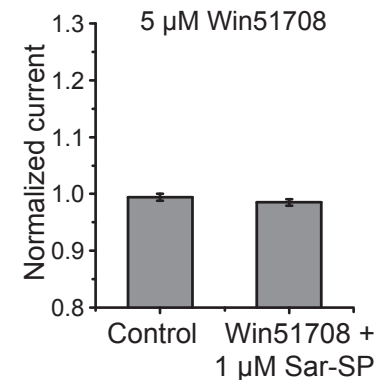**E**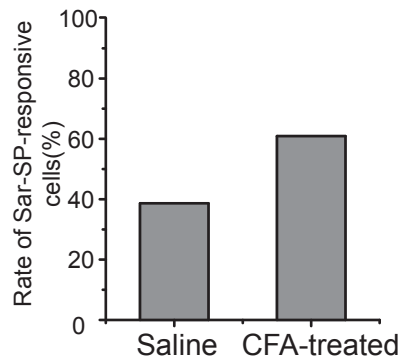**F**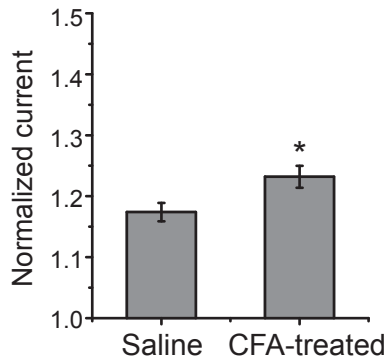**G**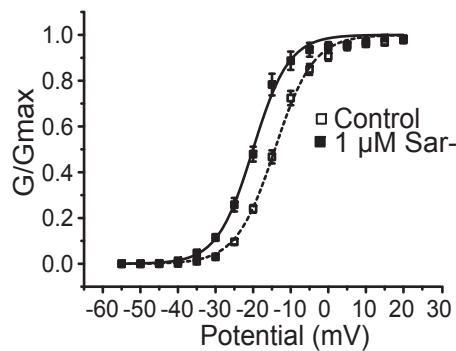**H**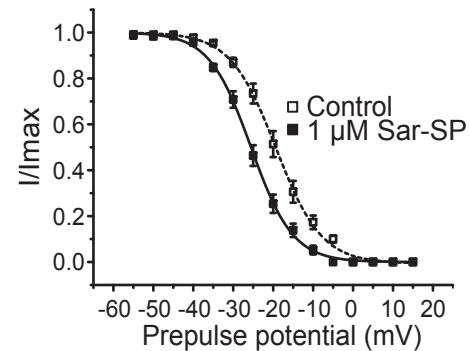

Supplement: MOESM2 [file 9612814]
